# Supplementary material
Source: PubMed Central journal article supplement (PMC1458938)
Supplement: pnas_0602017103_1.pdf [file pnas_0602017103_1.pdf]

DRX 502: 1H/13C HMBC 298K, inv4lrndpr

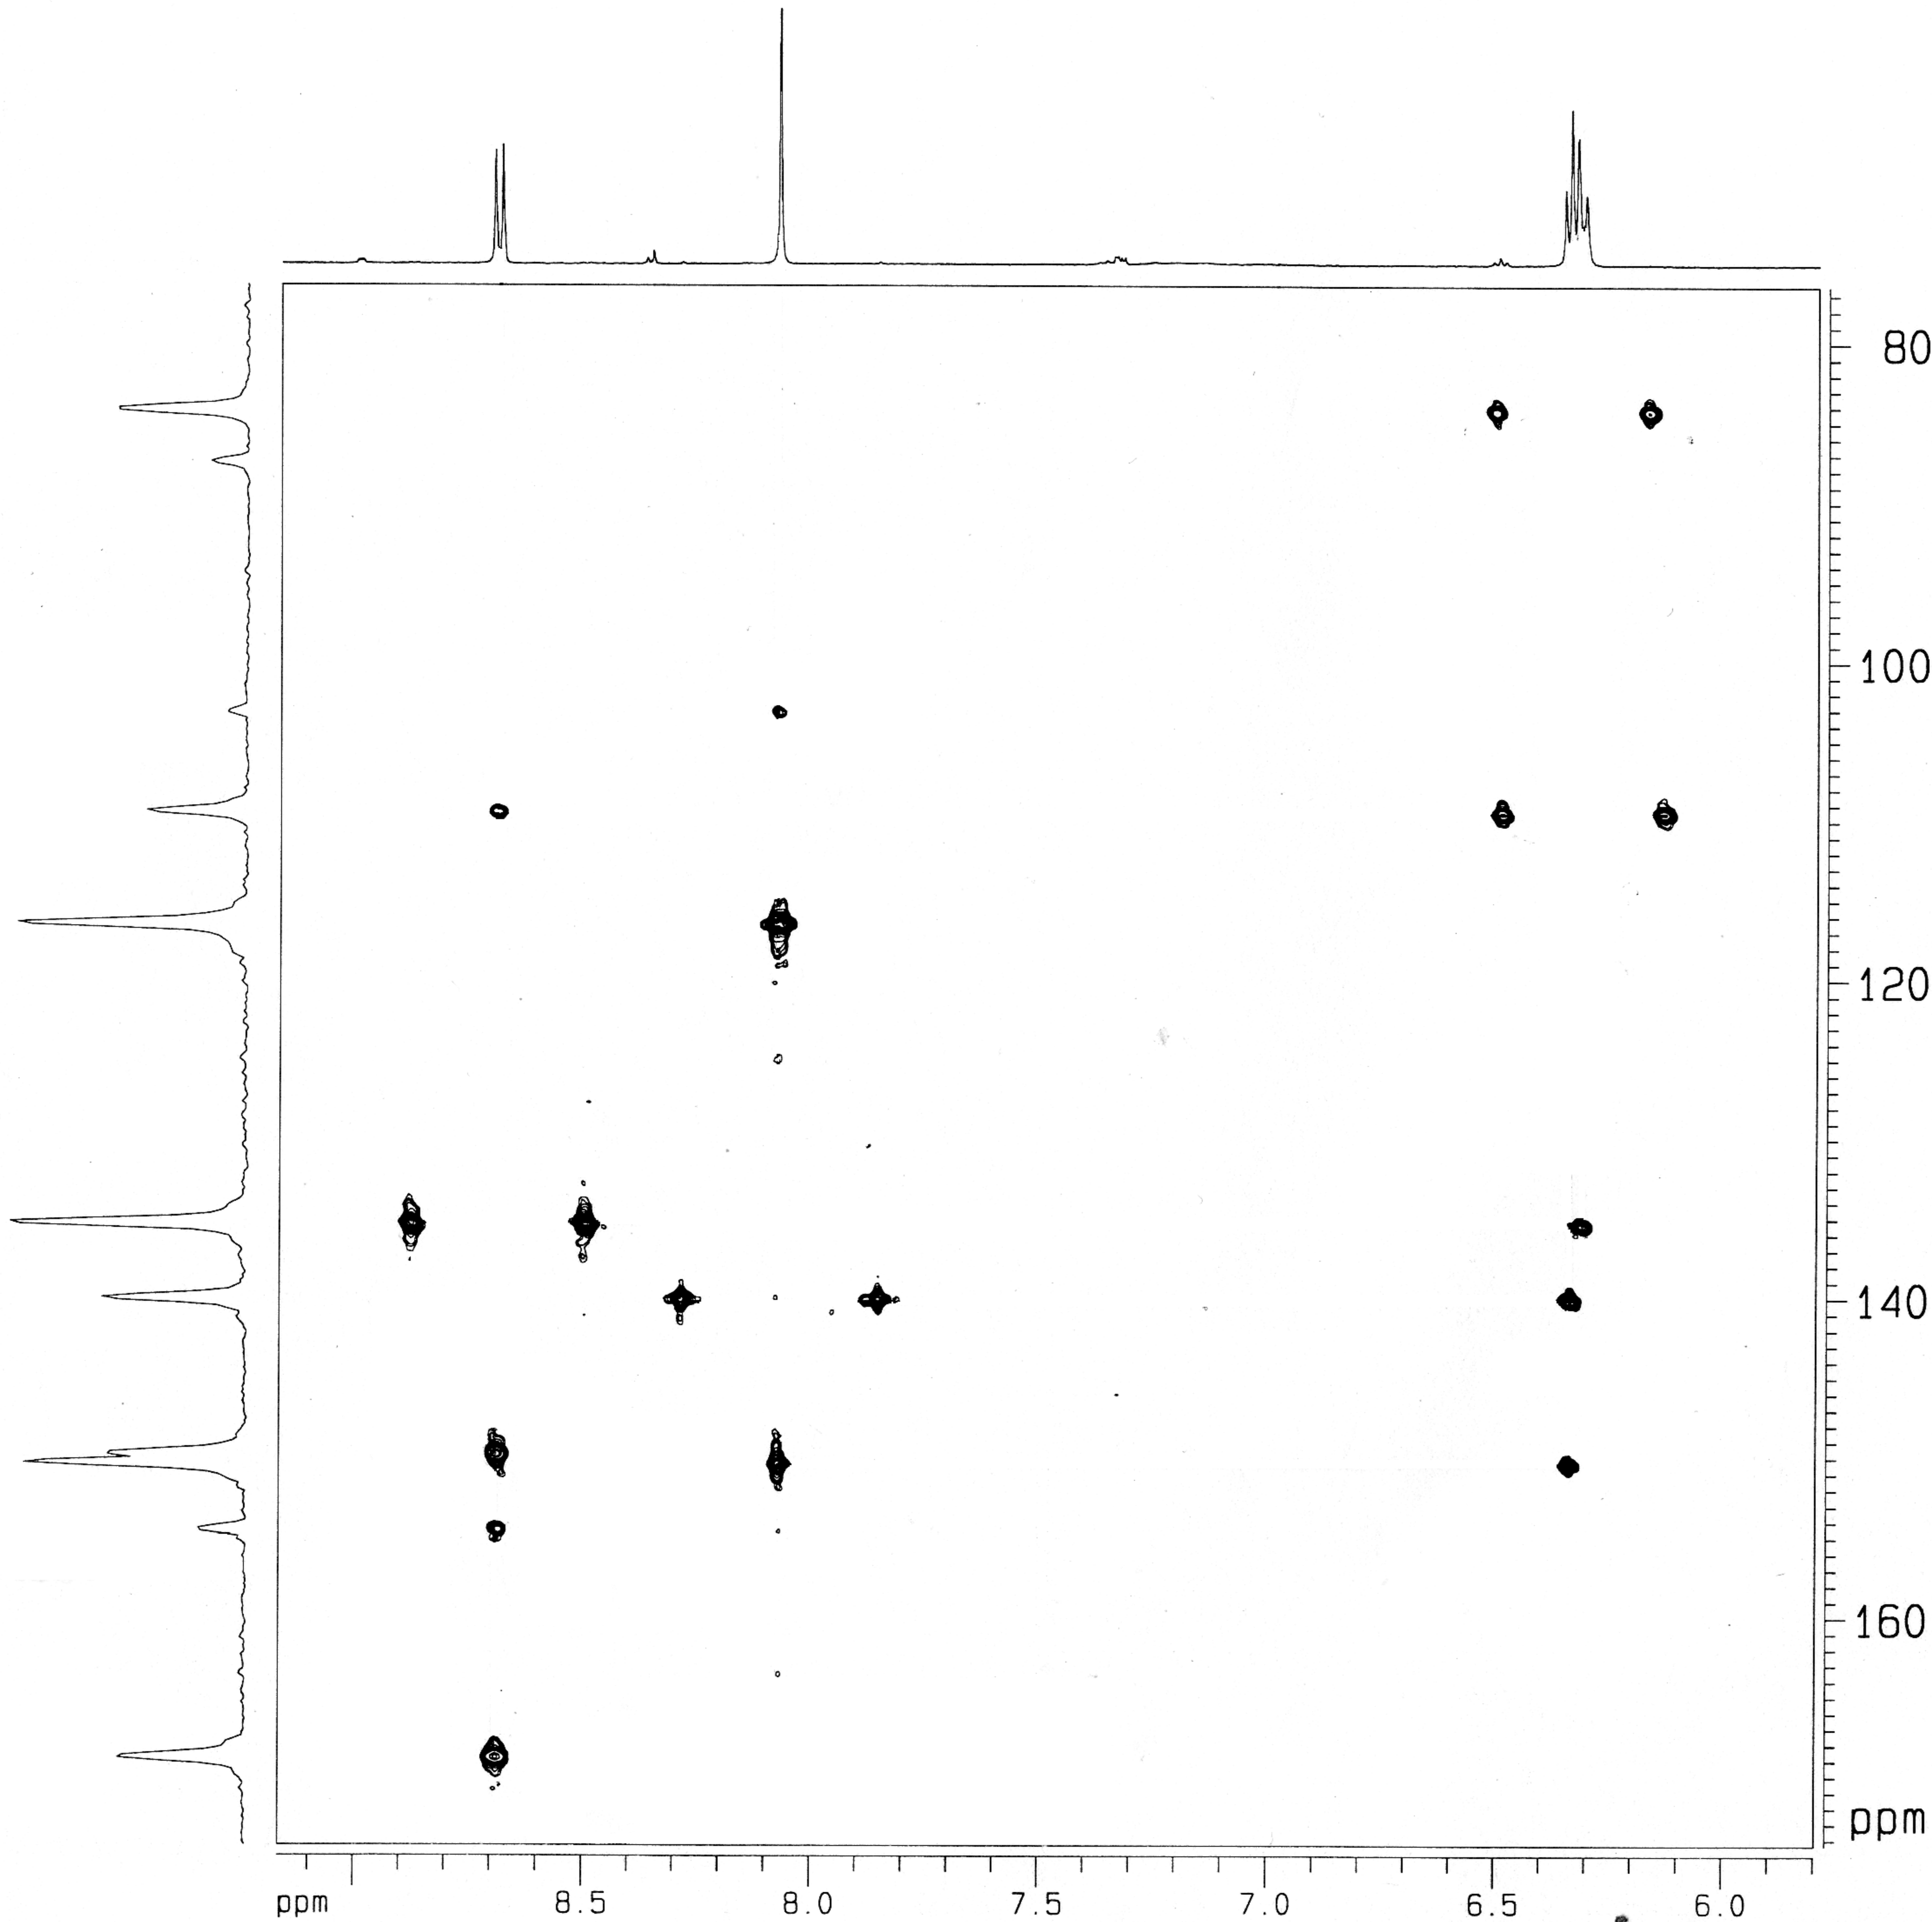

Current Data Parameters  
NAME michael  
EXPNO 3  
PROCNO 1

F2 - Acquisition Parameters  
Date\_ 20000825  
Time 2.10  
INSTRUM spect  
PROBHD 5 mm TXI 1H-1  
PULPROG inv4lrndpr  
TD 2048  
SOLVENT D2O  
NS 32  
DS 4  
SWH 5000.000 Hz  
FIDRES 2.441406 Hz  
AQ 0.2048500 sec  
RG 4096  
DW 100.000 usec  
DE 6.00 usec  
TE 300.0 K  
D0 0.0000300 sec  
D1 1.5000000 sec  
D6 0.0550000 sec  
D11 0.0200000 sec  
D12 0.0000200 sec  
D13 0.0000300 sec  
IN0 0.00002209 sec

===== CHANNEL f1 =====  
NUC1 1H  
P1 7.05 usec  
P2 14.10 usec  
PL1 0.00 dB  
PL9 70.00 dB  
SFO1 500.1323504 MHz

===== CHANNEL f2 =====  
NUC2 13C  
P3 16.40 usec  
PL2 -2.00 dB  
SFO2 125.7715724 MHz

F1 - Acquisition parameters  
ND0 2  
TD 450  
SFO1 125.7716 MHz  
FIDRES 50.304974 Hz  
SW 179.987 ppm

F2 - Processing parameters  
SI 2048  
SF 500.1300000 MHz  
WDW GSINE  
SSB 2  
LB 0.00 Hz  
GB 0  
PC 1.00

F1 - Processing parameters  
SI 1024  
MC2 QF  
SF 125.7577390 MHz  
WDW GSINE  
SSB 2  
LB 0.00 Hz  
GB 0

2D NMR plot parameters  
CX2 15.00 cm  
CX1 15.00 cm  
F2PLO 9.166 ppm  
F2LO 4584.24 Hz  
F2PHI 5.798 ppm  
F2HI 2899.67 Hz  
F1PLO 174.338 ppm  
F1LO 21924.40 Hz  
F1PHI 76.425 ppm  
F1HI 9610.98 Hz  
F2PPMCM 0.22455 ppm/cm  
F2HZCM 112.30470 Hz/cm  
F1PPMCM 6.52759 ppm/cm  
F1HZCM 820.89459 Hz/cm
